# Supplementary material for: Chiral separation ofdl-glutamic acid by ultrasonic field
Source: Royal Society of Chemistry journal article supplement (doi:10.1039/c6ce02027e), 2016-11-18
Supplement: c6ce02027e1.pdf [file c6ce02027e1.pdf]

## Supporting Information

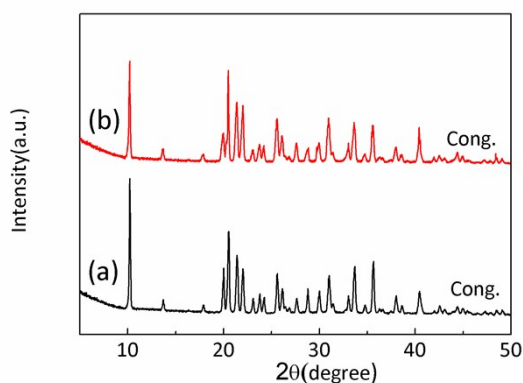

**Fig. S1** XRD patterns of the crystals obtained by adding L-Glu (a) or D-Glu (b) seeds in the racemic solution of DL-Glu under an ultrasonic field.

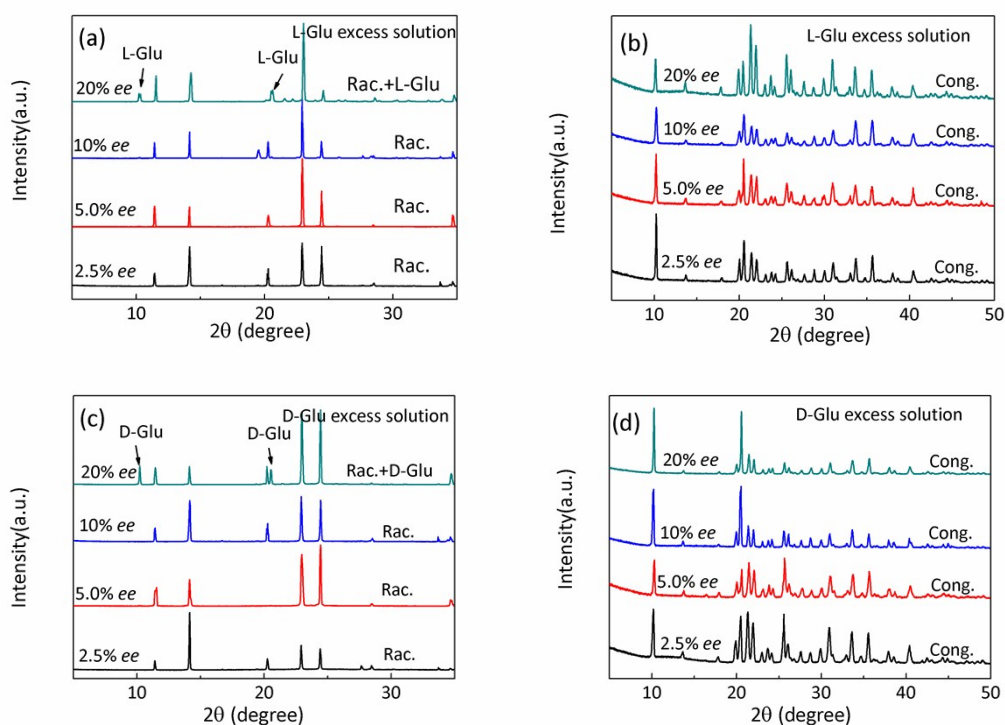

**Fig. S2** XRD patterns of the crystals obtained from one enantiomer excess solutions (2.5%, 5%, 10%, 20%) without ultrasonic field (a,c), or with an ultrasonic field (b,d).
